# Supplementary material for: Conserved expression of transposon-derived non-coding transcripts in primate stem cells
Source: PubMed Central journal article supplement (PMC5331655; doi:10.1186/s12864-017-3568-y), 2017-02-28
Supplement: 12864_2017_3568_MOESM1_ESM.pdf [file 12864_2017_3568_MOESM1_ESM.pdf]

# Conserved expression of transposon-derived non-coding transcripts in primate stem cells

LeeAnn Ramsay, Maria C. Marchetto, Maxime Caron,  
Shu-Huang Chen, Stephan Busche, Tony Kwan,  
Tomi Pastinen, Fred H. Gage, Guillaume Bourque

## 1 Supplementary Figures

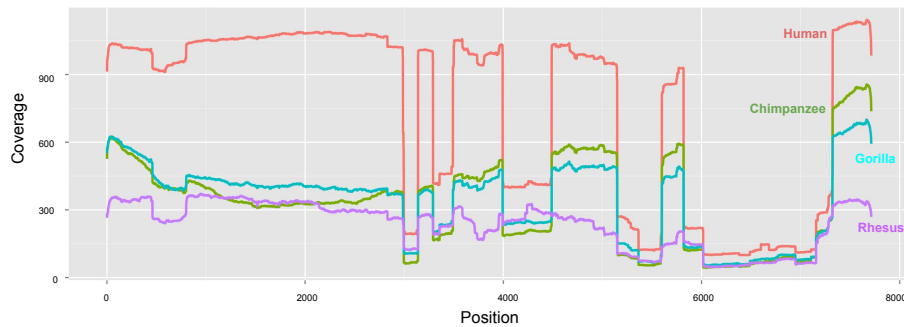

Figure S1: Observed HERVH sequence is consistent with its evolutionary history. X-axis is the consensus sequence for HERVH; integer values represent base pair locations. Y-axis is the number of HERVH instances which contain each base pair. At approximately base pair 6000 there is a large deleted segment. This is the ENV gene which was lost before major expansions of HERVH in the primate lineage.

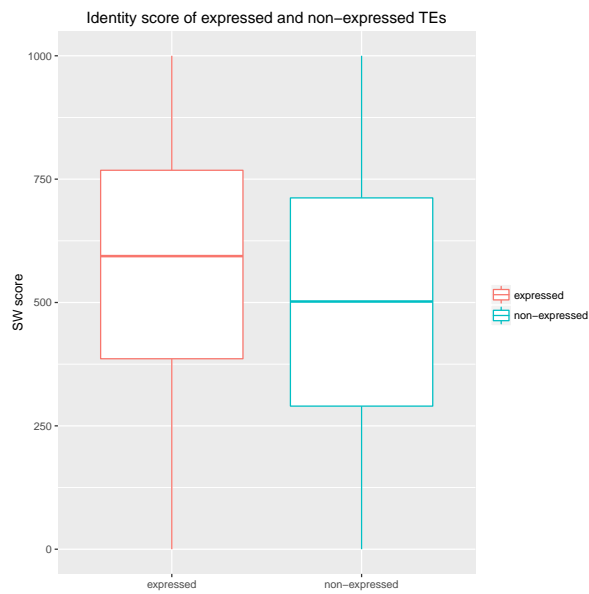

Figure S2: Distribution of identity scores for expressed and non-expressed TEs. We used scaled Smith-Waterman scores as a surrogate for age. Higher identity scores indicate younger TEs; more divergent sequences with lower scores are considered older. Expressed TEs are, on average, younger than non-expressed TEs. Expressed:  $RPKM \geq 1$ , non-expressed:  $RPKM = 0$ .

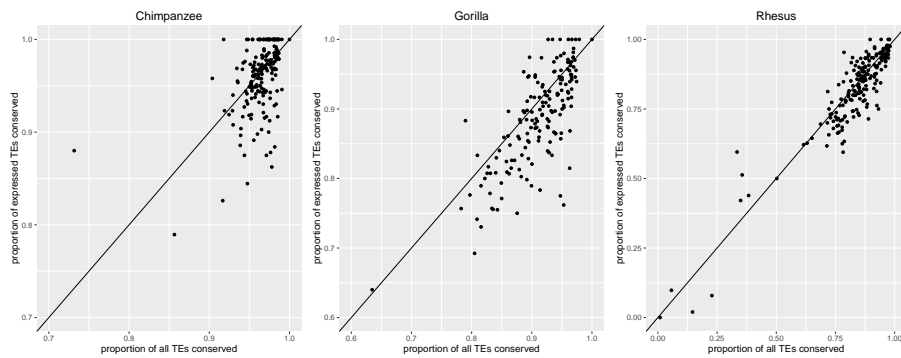

Figure S3: The proportion of entire TE families conserved between human and NHPs versus the proportion of human expressed TEs that are conserved. (a) Chimpanzee. (b) Gorilla. (c) Rhesus.

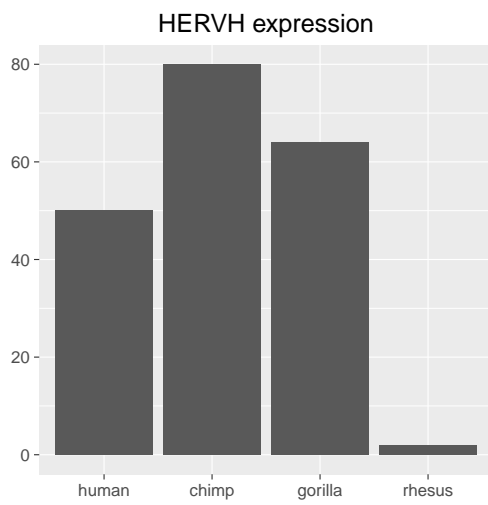

Figure S4: Number of HERVH expressed in each primates species.

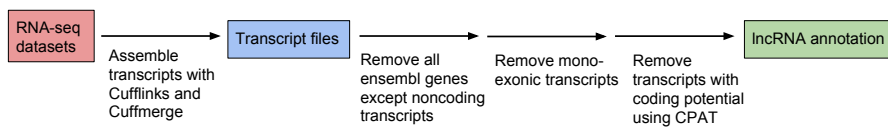

Figure S5: Outline of the pipeline used to generate lncRNA catalogues.

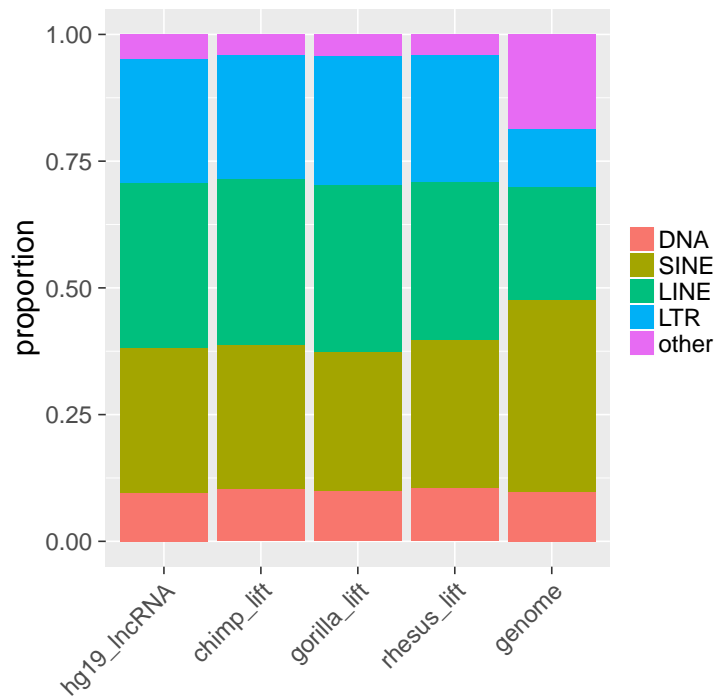

Figure S6: Proportion of lncRNAs labeled by TE class in human lncRNAs conserved in primates. Only lncRNAs that overlap TEs are included in these proportions. Rightmost bar is the genomic proportions of TEs in human.

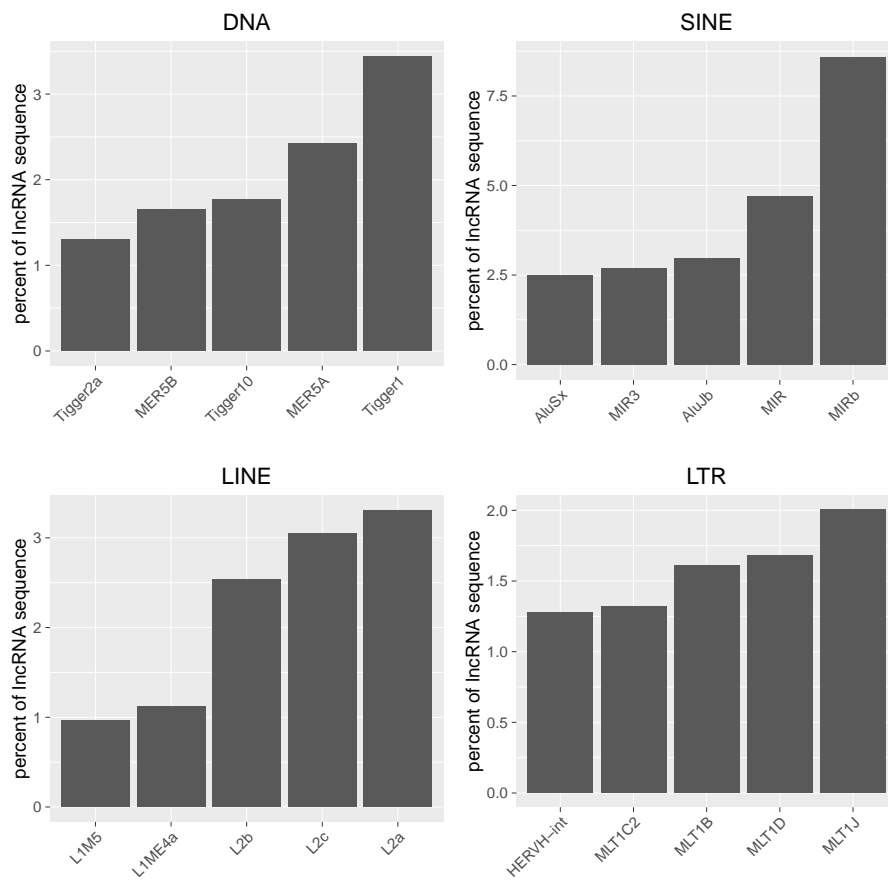

Figure S7: Percent of human lncRNA sequence made up by different TE families. The top 5 families from each of the 4 main classes are shown.

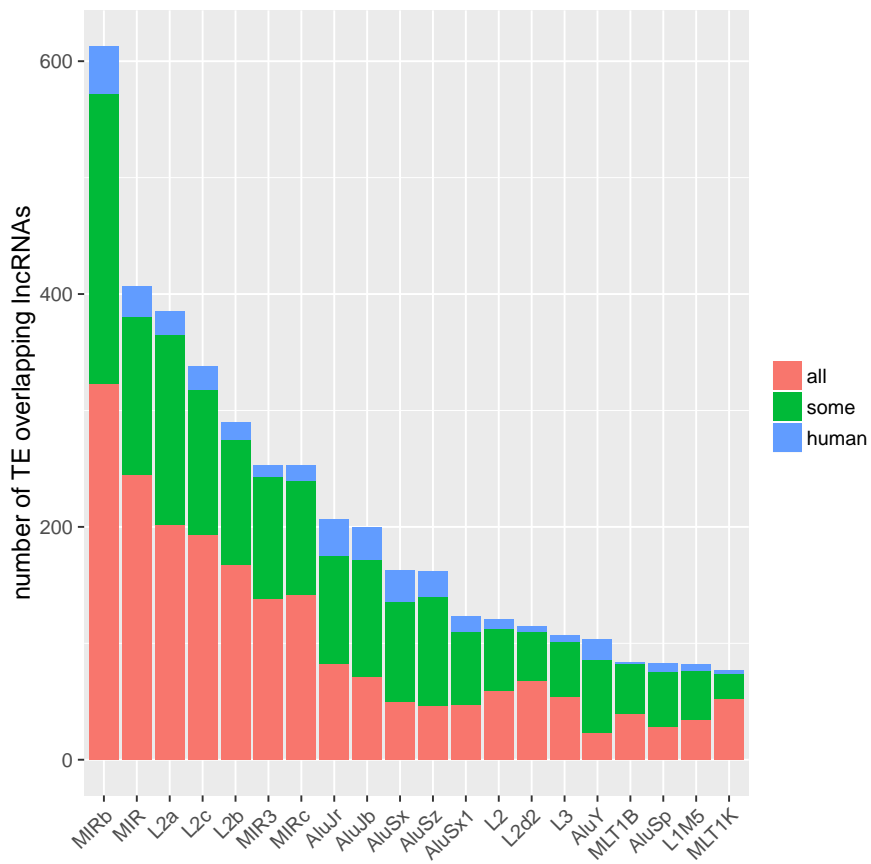

Figure S8: TEs that occur most frequently in human iPSC lncRNAs. Red represents lncRNAs which are conserved in all 4 primate species. Green are those conserved in 1 or 2 other NHPs. Blue are human specific lncRNAs.

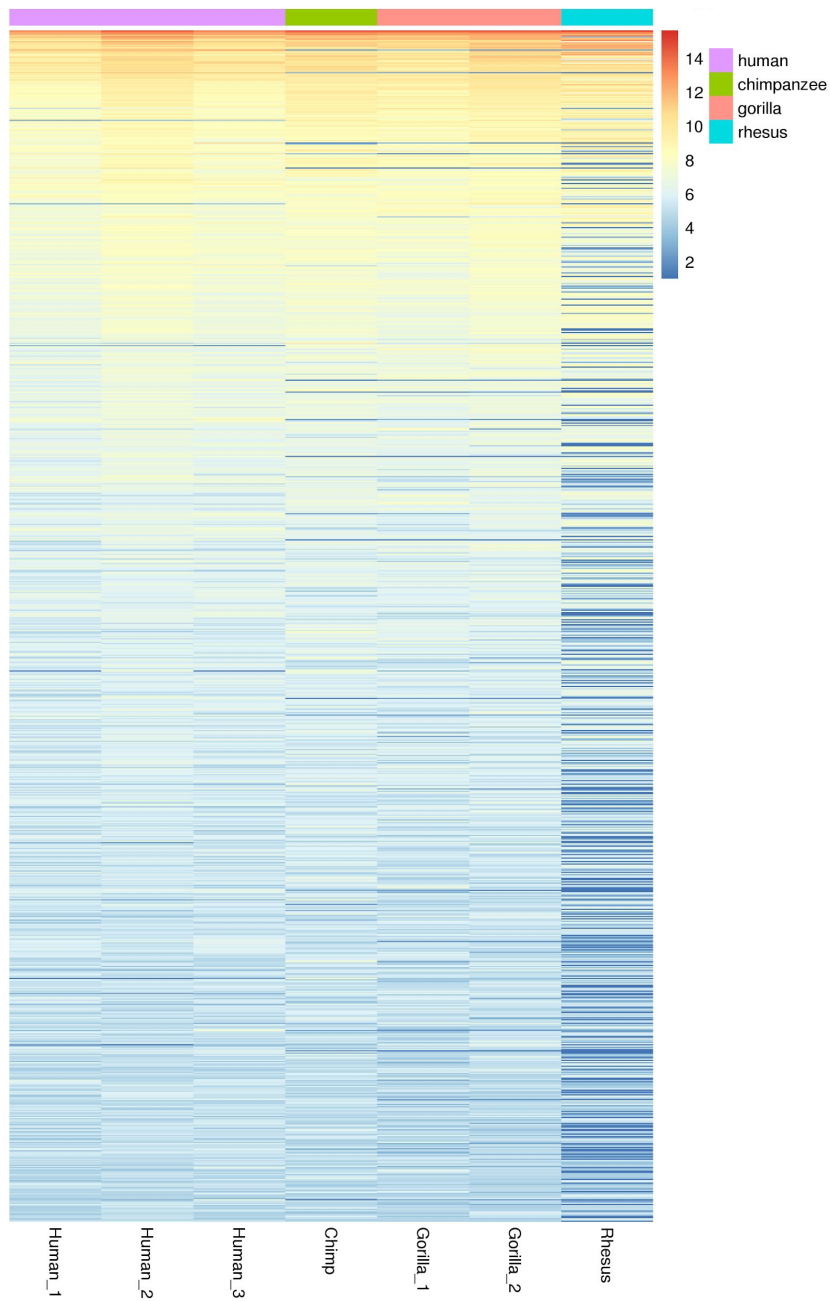

Figure S9: Heatmap of the expression of the top 1000 protein coding genes that are orthologous between human and the 3 NHPs. Coloring represents normalized level of gene expression.

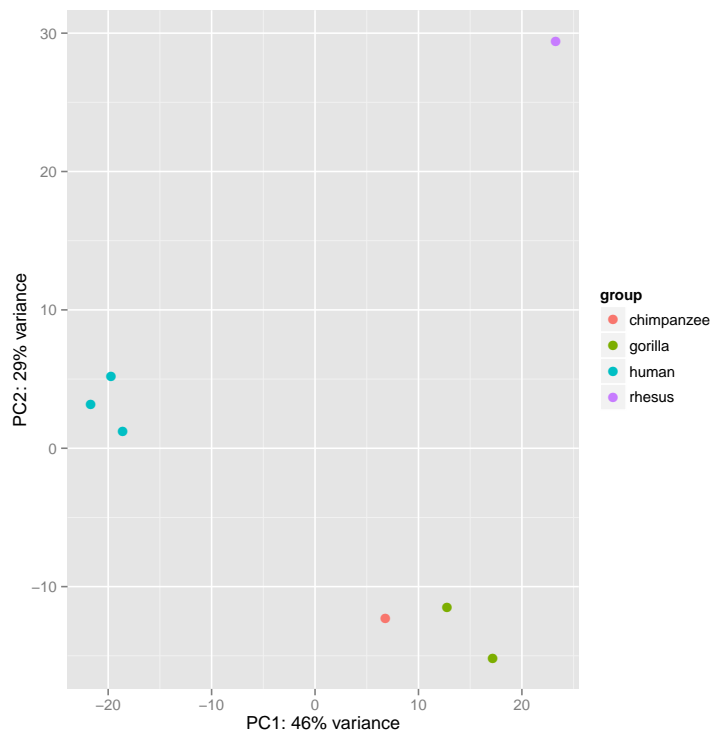

Figure S10: PCA analysis of the expression of all protein coding genes that are orthologous between human and the 3 NHPs.



## 2 Supplementary Tables

Table S1: Total number of TEs in each species' annotation, and the number of human TEs which have orthologous locations in the NHPs.

| <b>Species</b>    | <b>TE annotation</b> | <b>Conserved</b> |
|-------------------|----------------------|------------------|
| human (hg19)      | 4419227              | –                |
| chimp (panTro4)   | 4287630              | 3984803 (92.9%)  |
| gorilla (gorGor3) | 4291825              | 3913452 (91.2%)  |
| rhesus (rheMac3)  | 4259993              | 3597952 (84.5%)  |

Table S2: HERVH LiftOver verification. The number of LiftOver HERVH that are also annotated as HERVH by RepeatMasker in the target species. There are 1073 HERVH in human that do not overlap coding regions.

| <b>Species</b>    | <b>LiftOver</b> | <b>Properly annotated</b> |
|-------------------|-----------------|---------------------------|
| chimp (panTro4)   | 785             | 724 (92.2%)               |
| gorilla (gorGor3) | 681             | 615 (90.3%)               |
| rhesus (rheMac3)  | 157             | 136 (86.6%)               |

Table S3: Table of values for Figures 1-2 and table 1. See Supplementary File Table\_S3.txt.

Table S4: RNA-seq read statistics

| genome (replicate) | raw_reads   | filtered_reads | norRNA_reads | aligned_reads |
|--------------------|-------------|----------------|--------------|---------------|
| hg19 (1)           | 95,376,492  | 90,928,670     | 83,252,744   | 79,994,502    |
| hg19 (2)           | 88,425,668  | 84,434,790     | 76,504,782   | 73,685,598    |
| hg19 (3)           | 113,399,220 | 108,111,272    | 79,458,028   | 75,815,753    |
| hg19 (merged)      | 297,201,380 | 283,474,732    | 239,215,554  | 229,495,870   |
| gorGor3 (1)        | 99,352,516  | 94,324,612     | 82,850,012   | 74,300,557    |
| gorGor3 (2)        | 152,356,804 | 144,850,302    | 107,401,888  | 96,610,930    |
| panTro4 (1)        | 111,261,404 | 105,425,806    | 90,111,522   | 84,339,461    |
| rheMac3 (1)        | 73,458,568  | 67,867,152     | 59,762,614   | 53,060,992    |

Table S5: Table of coordinates for TEs in table 1. See Supplementary File Table\_S5.txt.

Table S6: The number of transcripts in each lncRNA annotation and proportion of transcripts which overlap at least one TE. After *de novo* lncRNA discovery the number of lncRNA transcripts is approximately comparable between human, chimp, and gorilla.

| Species    | With guide       |             | <i>De novo</i>   |             |
|------------|------------------|-------------|------------------|-------------|
|            | # of transcripts | Overlap TEs | # of transcripts | Overlap TEs |
| Human      | 9332             | 72.80%      | 1114             | 80.90%      |
| Chimpanzee | 1848             | 71.80%      | 1734             | 74.10%      |
| Gorilla    | 1323             | 70.80%      | 1342             | 70.60%      |
| Rhesus     | 882              | 79.10%      | 37               | 75.70%      |

Table S7: List of biotypes removed from Cufflinks transcript annotation for lncRNA annotation.

| Transcript classification                                                                                                                                                                                                                                                                                                                                                     |
|-------------------------------------------------------------------------------------------------------------------------------------------------------------------------------------------------------------------------------------------------------------------------------------------------------------------------------------------------------------------------------|
| <b>Protein coding</b><br>IG_C_gene, IG_D_gene, IG_J_gene, IG_LV_gene, IG_M_gene,<br>IG_V_gene, IG_Z_gene, nonsense_mediated_decay,<br>mathsf nontranslating_CDS, non_stop_decay, polymorphic_pseudogene,<br>protein_coding, TR_C_gene, TR_D_gene, TR_gene, TR_J_gene, TR_V_gene                                                                                               |
| <b>Pseudogene</b><br>disrupted_domain, IG_C_pseudogene, IG_J_pseudogene,<br>IG_pseudogene, IG_V_pseudogene, processed_pseudogene, pseudogene,<br>transcribed_processed_pseudogene, transcribed_unprocessed_pseudogene,<br>translated_processed_pseudogene, translated_unprocessed_pseudogene,<br>TR_J_pseudogene, TR_V_pseudogene, unitary_pseudogene, unprocessed_pseudogene |
| <b>Short non-coding</b><br>miRNA, miRNA_pseudogene, misc_RNA, misc_RNA_pseudogene,<br>Mt_rRNA, Mt_tRNA, Mt_tRNA_pseudogene, ncRNA, pre_miRNA, RNase_MRP_RNA,<br>RNase_P_RNA, rRNA, rRNA_pseudogene, scRNA_pseudogene, snlRNA, snoRNA,<br>snoRNA_pseudogene, snRNA, snRNA_pseudogene, SRP_RNA, tmRNA, tRNA, tRNA_pseudogene                                                    |
